# Supplementary material for: Engineering metal–organic framework towards suppressed leakage current in polymer nanocomposites
Source: Royal Society of Chemistry journal article supplement (doi:10.1039/d5ta00458f), 2025-01-01
Supplement: d5ta00458f1.pdf [file d5ta00458f1.pdf]

*Supporting Information for*

**Engineering Metal-Organic Framework Towards Suppressed  
Leakage Current in Polymer Nanocomposites**

Fanrong Kong<sup>1</sup>, Wenying Zhou<sup>1,\*</sup>, Fan Zhang<sup>2</sup>, Weiwei Li<sup>1</sup>, Haomiao Li<sup>3</sup>,  
Yuanwei Zhu<sup>3</sup>, Bin Zhou<sup>1</sup>, Tian Yao<sup>1</sup>, Bo Li<sup>4,\*</sup>

<sup>1</sup>School of Chemistry and Chemical Engineering, Xi'an University of Science & Technology, Xi'an, 710054, China.

<sup>2</sup>School of Chemistry, Southwest Jiaotong University, Chengdu, 610031, China.

<sup>3</sup>State Key Laboratory of Electrical Insulation and Power Equipment, School of Electrical Engineering, Xi'an Jiaotong University, Xi'an, 710049, China.

<sup>4</sup>Department of Materials Science and Engineering, The Pennsylvania State University, University Park, PA 16802, United States.

\*Corresponding author

E-mail address: wyzhou2004@163.com (Wenying Zhou); bolipsu@gmail.com (Bo Li).

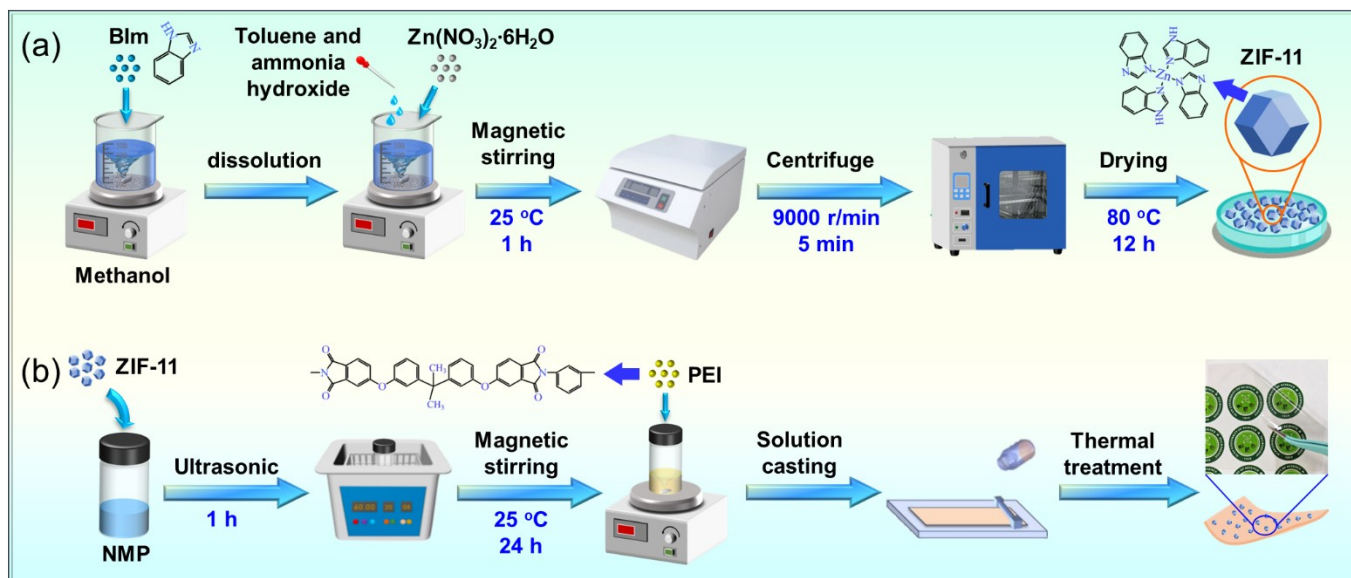

**Fig. S1.** Schematic illustration for of the preparation of (a) ZIF-11 particles and (b) ZIF-11/PEI nanocomposites.

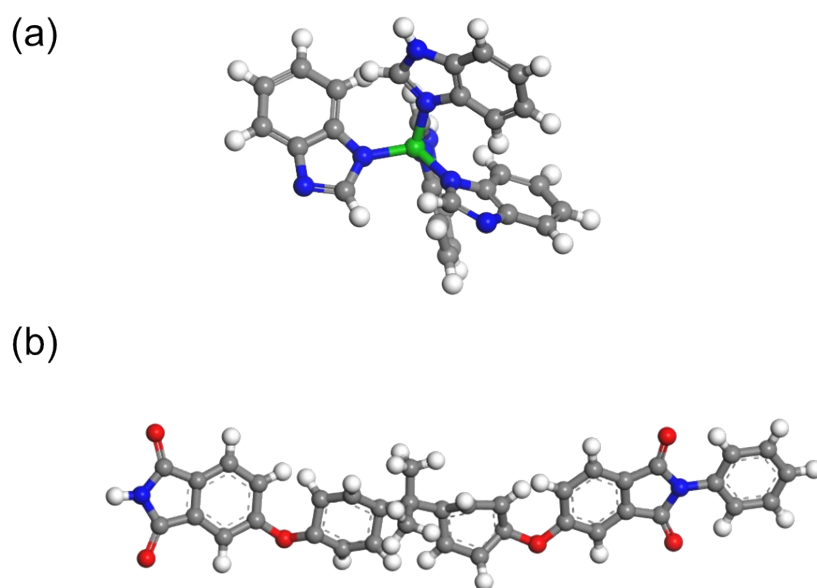

**Fig. S2.** Structures of (a) ZIF-11 and (b) PEI.

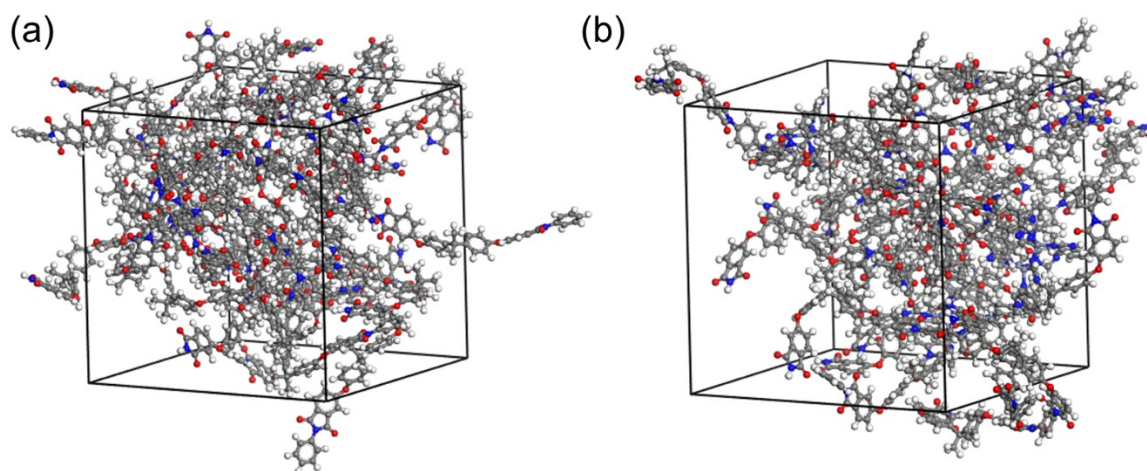

**Fig. S3.** Polymer configuration of (a) pure PEI, (b) ZIF-11/PEI nanocomposite.

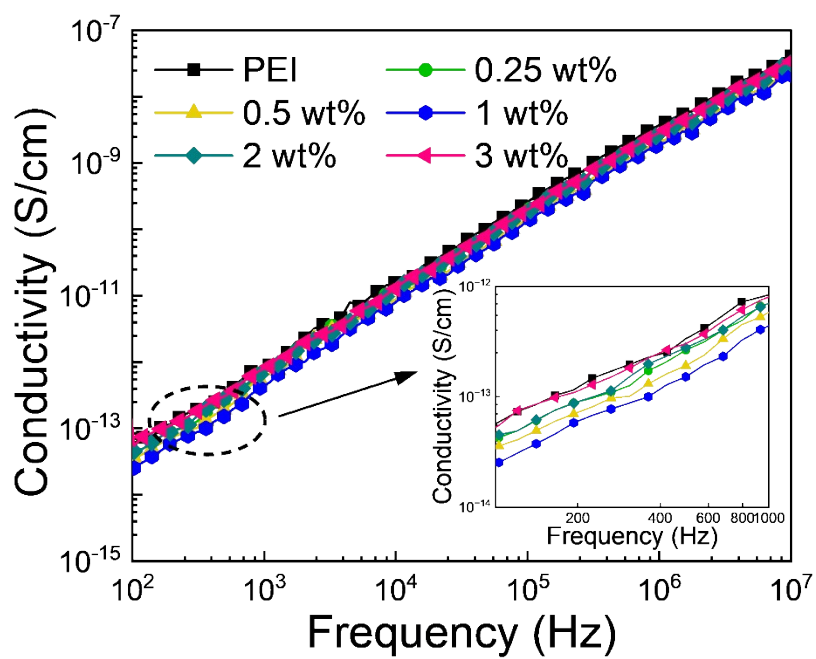

**Fig. S4.** The conductivity of PEI and ZIF-11/PEI nanocomposites at different frequencies.

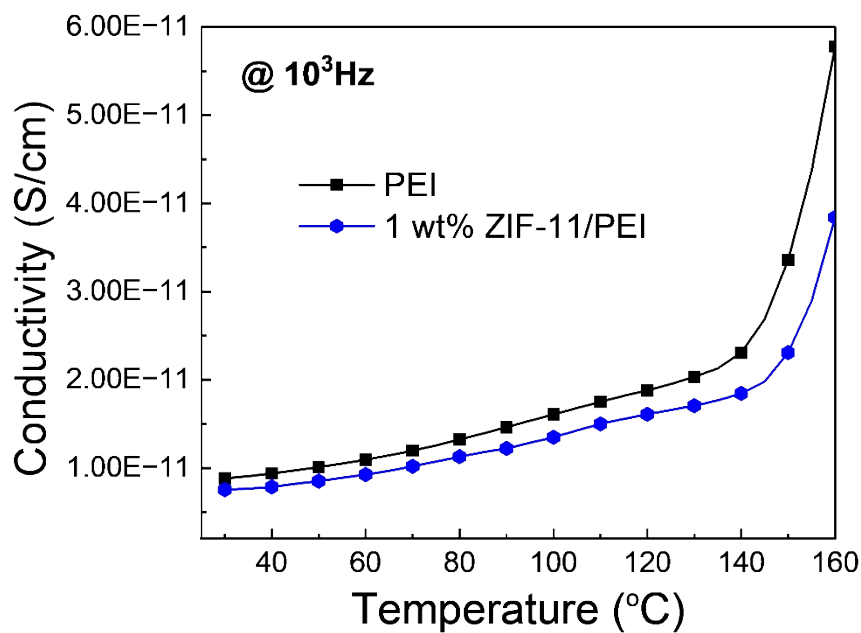

Fig. S5. The temperature dependence of conductivity at  $10^3$  Hz for PEI and 1 wt% ZIF-11/PEI.

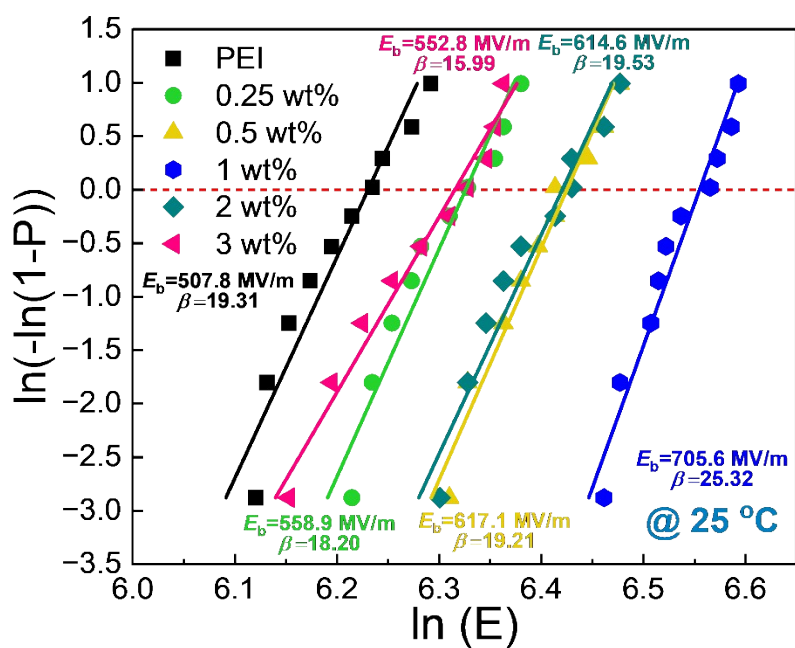

Fig. S6. Weibull distribution analysis of the breakdown strength for PEI and ZIF-11/PEI nanocomposites at  $25^{\circ}\text{C}$ .

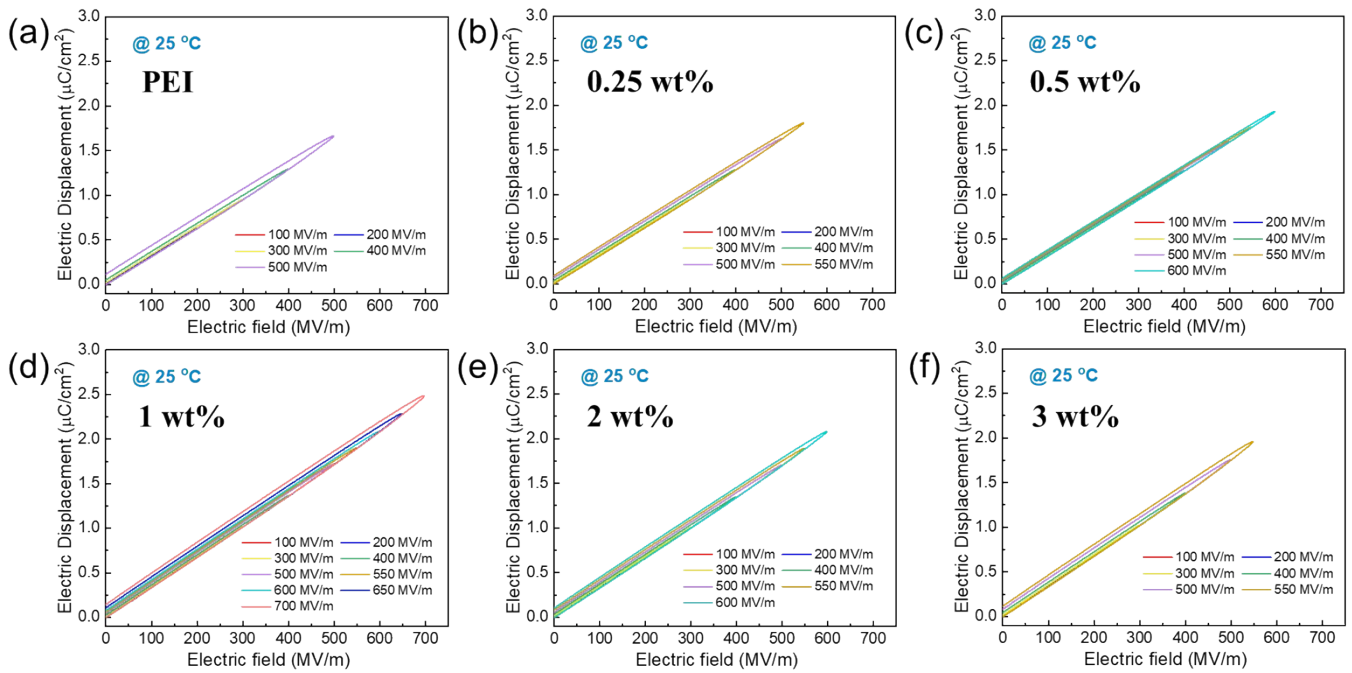

**Fig. S7.** *D-E* loops of (a) raw PEI. (b) 0.25 wt% ZIF-11/PEI. (c) 0.5 wt% ZIF-11/PEI. (d) 1 wt% ZIF-11/PEI. (e) 2 wt% ZIF-11/PEI and (f) 3 wt% ZIF-11/PEI at different electric field at room temperature.

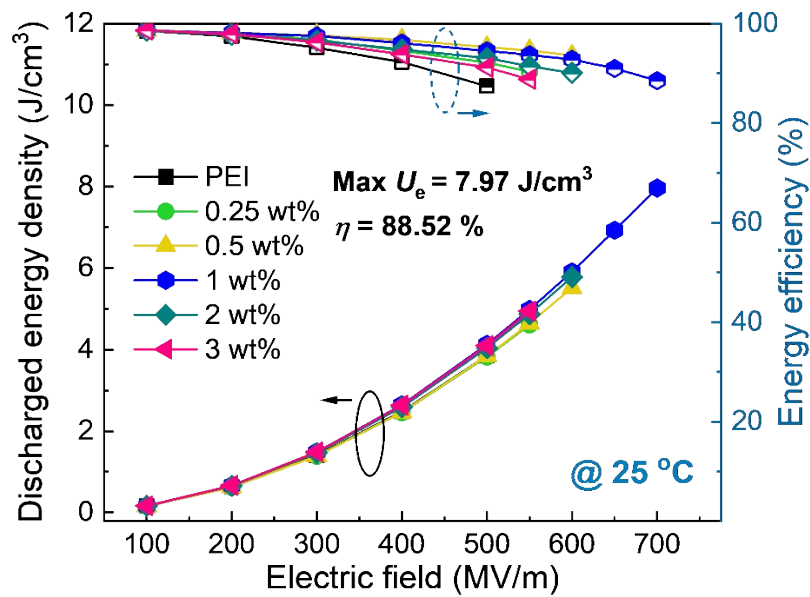

**Fig. S8.** Energy storage properties of pure PEI and ZIF-11/PEI nanocomposites at room temperature.

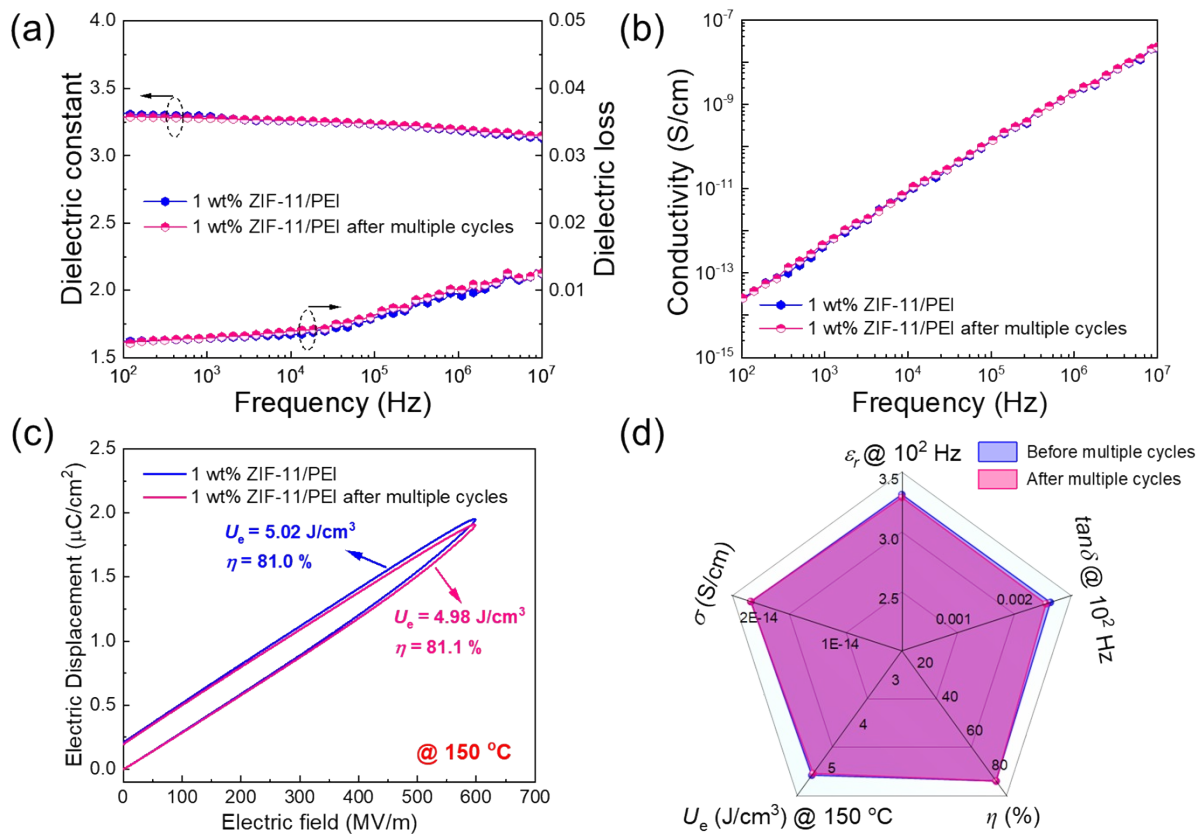

**Fig. S9.** Variation of (a)  $\epsilon_r$ ,  $\tan\delta$  and (b)  $\sigma$  with frequency for 1 wt% ZIF-11/PEI nanocomposites before and after multiple cycles. (c)  $D$ - $E$  loops of the 1 wt% ZIF-11/PEI nanocomposites before and after multiple cycles. (d) The radar plot summarizes the main performance parameters of the 1 wt% ZIF-11/PEI nanocomposites before and after multiple cycles.
